# Supplementary material for: Formation of a stable RNase Y-RicT (YaaT) complex requires RicA (YmcA) and RicF (YlbF)
Source: PubMed Central journal article supplement — bioRxiv. 2023 May 23:2023.05.22.541740. Preprint. [Version 1] doi: 10.1101/2023.05.22.541740 (PMC10245838; doi:10.1101/2023.05.22.541740), 2023-05-23
Supplement: NIHPP2023.05.22.541740v1-supplement-1.pdf [file NIHPP2023.05.22.541740v1-supplement-1.pdf]

Table S1

Mass Spectrometry Data: Pull-down with Rny-3FL

| Protein | # AA (peptides) <sup>a</sup> | Coverage (%) <sup>b</sup> | Abundance <sup>c</sup> (IS75-1) | Abundance <sup>c</sup> (IS75-2) | Abundance <sup>c</sup> (Rny-3FL-1) | Abundance <sup>c</sup> (Rny-3FL-2) | Ratio <sup>d</sup> | T test |
|---------|------------------------------|---------------------------|---------------------------------|---------------------------------|------------------------------------|------------------------------------|--------------------|--------|
| Rny     | 520 (72))                    | 85.77                     | 2.1                             | 3                               | 173.5                              | 221.4                              | 77.2               | 0.01   |
| RicT    | 275 (29)                     | 80.0                      | 6.5                             | 8                               | 191                                | 194.5                              | 26.6               | 0.00   |
| RicF    | 149 (3)                      | 27.52                     | 0                               | 0                               | 1 peptide <sup>e</sup>             | 0                                  | -                  | 0.42   |
| RicA    | 143 (2)                      | 18.18                     | 49.5                            | 114.6                           | 94.4                               | 141.4                              | 1.4                | 0.47   |
| Eno     | 430 (28)                     | 73.26                     | 72.1                            | 99.4                            | 118                                | 110.5                              | 1.3                | 0.18   |
| PfkA    | 319 (31)                     | 79.62                     | 81.5                            | 109.9                           | 121.7                              | 86.9                               | 1.1                | 0.74   |
| Pnp     | 705 (42)                     | 56.03                     | 82.3                            | 105.2                           | 114.5                              | 98                                 | 1.1                | 0.47   |
| CshA    | 494 (39)                     | 63.56                     | 44.7                            | 90.1                            | 166.3                              | 98.8                               | 2.0                | 0.25   |
| RnjB    | 555 (44)                     | 82.34                     | 6.4                             | 97.1                            | 184                                | 112.6                              | 2.9                | 0.24   |
| RnjA    | Not detected                 |                           |                                 |                                 |                                    |                                    |                    |        |

<sup>a</sup>Total number of amino acid residues (predicted number of peptides after trypsinization).

<sup>b</sup>Combined identified amino acids/total amino acids in the protein.

<sup>c</sup>Reflects the signal strength in the raw data.

<sup>d</sup>(Average abundance for Rny-3FL/average abundance for IS75).

<sup>e</sup>One peptide was detected in this sample.

Table S2

Strains

| Strain number     | Relevant genotype <sup>a</sup>                                                         | Source     |
|-------------------|----------------------------------------------------------------------------------------|------------|
| IS75 <sup>a</sup> | <i>his leu met</i>                                                                     | Lab strain |
| BD9000            | <i>rny-3FL (spc)</i>                                                                   | This work  |
| BD9170            | <i>P<sub>spac</sub>-ricT-3FL::thr (erm) ricT::kan<sup>b</sup></i>                      | This work  |
| BD9171            | <i>P<sub>spac</sub>-ricF-3FL::thr (erm) ricF::(kan<sup>b</sup></i>                     | This work  |
| BD9172            | <i>P<sub>spac</sub>-ricA-3FL::thr (erm) ric::kan<sup>b</sup></i>                       | This work  |
| BD9195            | <i>rny-3FL (spc) ΔricA<sup>c</sup></i>                                                 | This work  |
| BD9196            | <i>rny-3FL (spc) ΔricF<sup>c</sup></i>                                                 | This work  |
| BD9210            | <i>rny-3FL (spc) ricT C161S</i>                                                        | This work  |
| BD9211            | <i>rny-3FL (spc) ricT C198S</i>                                                        | This work  |
| BD9212            | <i>rny-3FL (spc) ricT C167S</i>                                                        | This work  |
| BD9217            | <i>P<sub>spac</sub>-ricT-3FL::thr (erm) rny::kan<sup>b</sup></i>                       | This work  |
| B9218             | <i>P<sub>spac</sub>-ricT-3FL::thr (erm) rny::kan<sup>b</sup> ricA::spc<sup>d</sup></i> | This work  |

<sup>a</sup>All strains were constructed in the IS75 background.

<sup>b</sup>These knockouts were obtained from the Bacillus Genetic Stock Center and were constructed by Koo et al (36).

<sup>c</sup>These deletions are markerless. Cassettes were removed using pDR244 (36).

<sup>d</sup>A gift from the late A. A. Neyfakh.

Table S3

Oligonucleotides

| Name          | Sequence <sup>a</sup>                                        |
|---------------|--------------------------------------------------------------|
| Rny-F         | GTCAT <b>CGAATT</b> CTTCGTAAAACCATGCCC                       |
| Rny-R         | GTCAT <b>CGGATC</b> CTTTTGCATACTCTACGGC                      |
| RicT-F1       | CGAG <b>GGTACC</b> CTTGGTGTTAATGTTGCAGG                      |
| RicT-R1       | GTATCCGCACAAACCACAGATAGCGCT <b>ATCG</b> <sup>b</sup>         |
| RicT-F2       | CCAAAAA <b>ACTGCTGCCTTCGGATCC</b> GATATCCTAACAGCACAAGAG      |
| RicT-R2       | GGGCTTTTTTCCATGCAAGCTAATTCGGATCC <b>AAGCTT</b> ATCGAATTCGATA |
| <b>RicA-F</b> | TGATCTAGAGTCGAG <b>GGTACC</b> GAAAGGAGAAAATATGACATG          |
| <b>RicA-R</b> | CAAATAACAGCTGTTCTCT <b>CATCGAT</b> CGGCCGGATTATAAGGAT        |
| <b>RicF-F</b> | TGATCTAGAGTCGAG <b>GGTACC</b> CTGGAGGTGCATGTTATG             |
| <b>RicF-F</b> | CTGCGGATGTAAAGTGTCC <b>ATCGAT</b> CGGCCGGATTATAAGGAT         |

<sup>a</sup>Relevant restriction sites are in bold face.

<sup>b</sup>This incomplete *Cla*I site is completed by the Gibson Assembly step.

**Fig. S1.** Verification of the Ric-3FL constructs. Panels A, B and C show that the RicT-3FL, RicF-3FL and RicA-3FL express the appropriate fusion proteins, detectable using both anti-Ric and anti-FLAG antisera and that the constructs are IPTG-inducible. These strains did not carry knockouts of the native *ric* genes and thus signals for the untagged proteins were detected.

**Fig. S2.** Ric-3FL and Rny-3FL proteins support processing of the *cggR gapA* transcript. Northern blotting was carried out using a probe complementary to the coding strand of *gapA*. Each of the four fusion strains were the only source of RicA, RicF, RicT and Rny in the cells. U and P show the positions of the unprocessed and processed RNA species (~2.2 and ~1.2 kb, respectively). The *ricT* deletion and wild-type (IS75) control lanes show the positions of these two species, respectively.

**Fig. S3.** Verification of anti-serum specificities and of the anti-FLAG magnetic beads. (A) The appropriate Ric proteins bands are missing from total lysates of each indicated deletion strain. (B) In a lysate of the Rny-3FL strain, the anti-FLAG and anti-Rny antisera reveal the fusion protein, but only the wild-type Rny signal is evident in a wild-type lysate. (C) An eluant fraction is shown from a pull-down experiment using an Rny-3FL lysate and anti-FLAG antiserum. The magnetic beads successfully pull down Rny-3FL. (D) Eluant fractions from pull-down experiment using wild-type and Rny-3FL lysates. The blots were developed with anti-Ric antiserum. RicT does not bind non-specifically to the beads. (E) No signal is detected in the eluant fraction from a mock pull-down experiment with a wild-type lysate, using anti-Rny antiserum.

**Fig. S4.** The three Ric-3FL constructs can pull one another down with anti-FLAG beads. In all three panels the blots were developed with anti-Ric antiserum. The empty arrow shows a cross-reacting band.

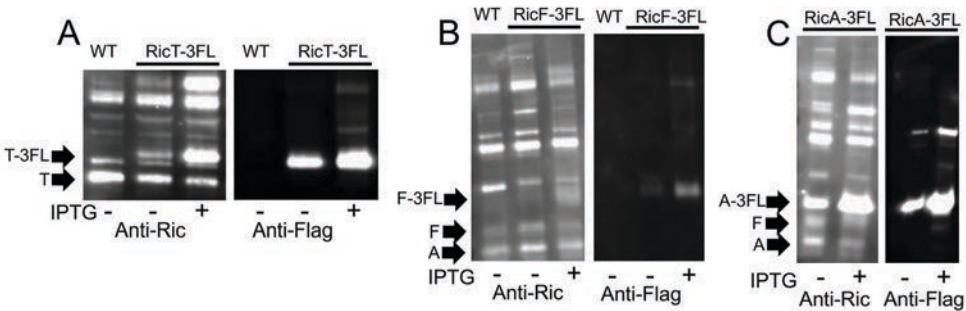

**Fig. S1.** Verification of the Ric-3FL constructs. Panels A, B and C show that the RicT-3FL, RicF-3FL and RicA-3FL express the appropriate fusion proteins, detectable using both anti-Ric and anti-FLAG antisera and that the constructs are IPTG-inducible. These strains did not carry knockouts of the native *ric* genes and thus signals for the untagged proteins were detected.

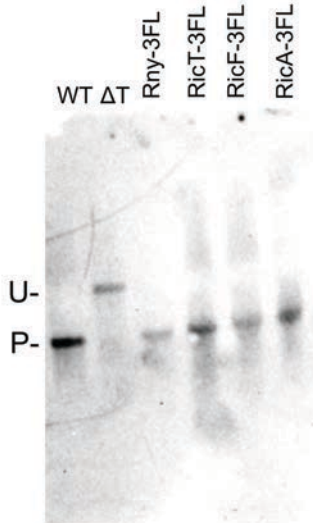

**Fig. S2.** Ric-3FL and Rny-3FL proteins support processing of the *cggR gapA* transcript. Northern blotting was carried out using a probe complementary to the coding strand of *gapA*. Each of the four fusion strains was the only source of RicA, RicF, RicT and Rny in the cells. U and P show the positions of the unprocessed and processed RNA species (~2.2 and ~1.2 kb, respectively). The *ricT* deletion and wild-type (S75) control lanes show the positions of these two species, respectively.

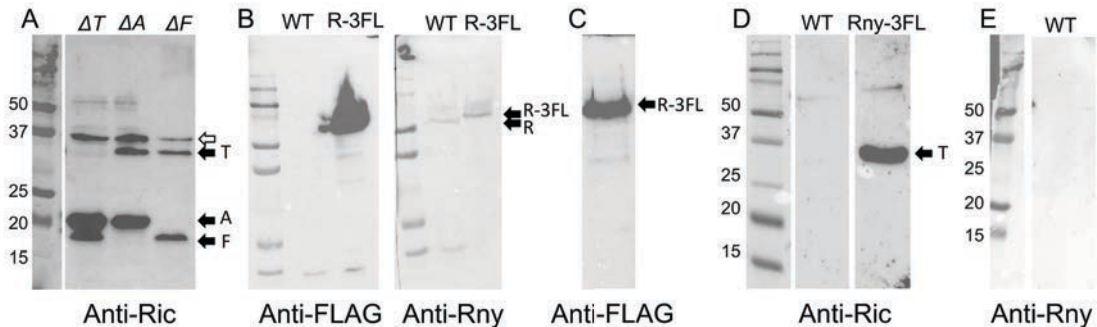

**Fig. S3.** Verification of anti-serum specificities and of the anti-FLAG magnetic beads. (A) The appropriate Ric proteins bands are missing from total lysates of each indicated deletion strain. (B) In a lysate of the Rny-3FL strain, the anti-FLAG and anti-Rny antisera reveal the fusion protein, but only the wild-type Rny signal is evident in a wild-type lysate. (C) An eluant fraction is shown from a pull-down experiment using an Rny-3FL lysate and anti-FLAG antiserum. The magnetic beads successfully pull down Rny-3FL. (D) Eluant fractions from pull-down experiment using wild-type and Rny-3FL lysates. The blots were developed with anti-Ric antiserum. RicT does not bind non-specifically to the beads. (E) No signal is detected in the eluant fraction from a mock pull-down experiment with a wild-type lysate, using anti-Rny antiserum.

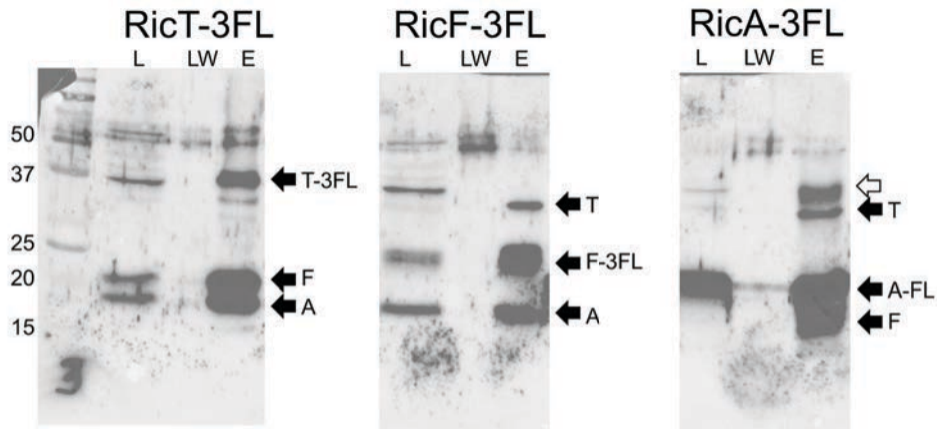

**Fig. S4.** The three Ric-3FL constructs can pull one another down with anti-FLAG beads. In all three panels the blots were developed with anti-Ric antiserum. The empty arrow shows a cross-reacting band.
